# Supplementary material for: Association of Pathway Mutations With Survival in Taiwanese Breast Cancers
Source: Frontiers journal article supplement (doi:10.3389/fonc.2022.819555), 2022-07-22

Figure S1 Kaplan–Meier survival curves for overall survival analysis based on of somatic missense mutation numbers in breast cancer patients.

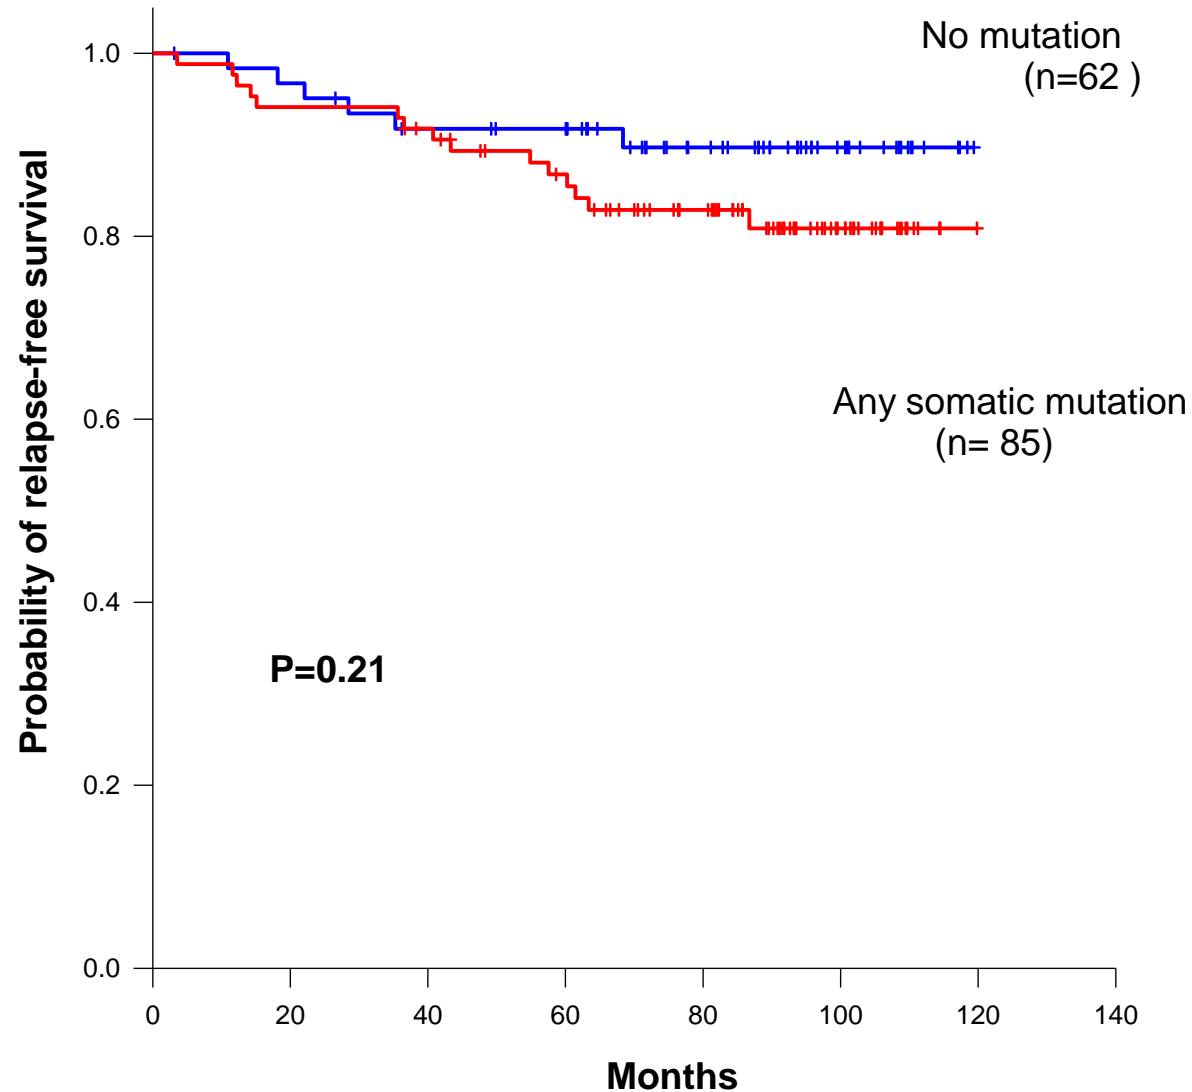

Supplement: Data_Sheet_3.zip [file Supplementary Figure 1.PDF › Supplementary Figure 1.PDF]
