# Supplementary material for: Association of Pathway Mutations With Survival in Taiwanese Breast Cancers
Source: Frontiers journal article supplement (doi:10.3389/fonc.2022.819555), 2022-07-22

Figure S4 Kaplan–Meier survival curves for overall survival analysis based on of gene mutation numbers in breast cancer patients.

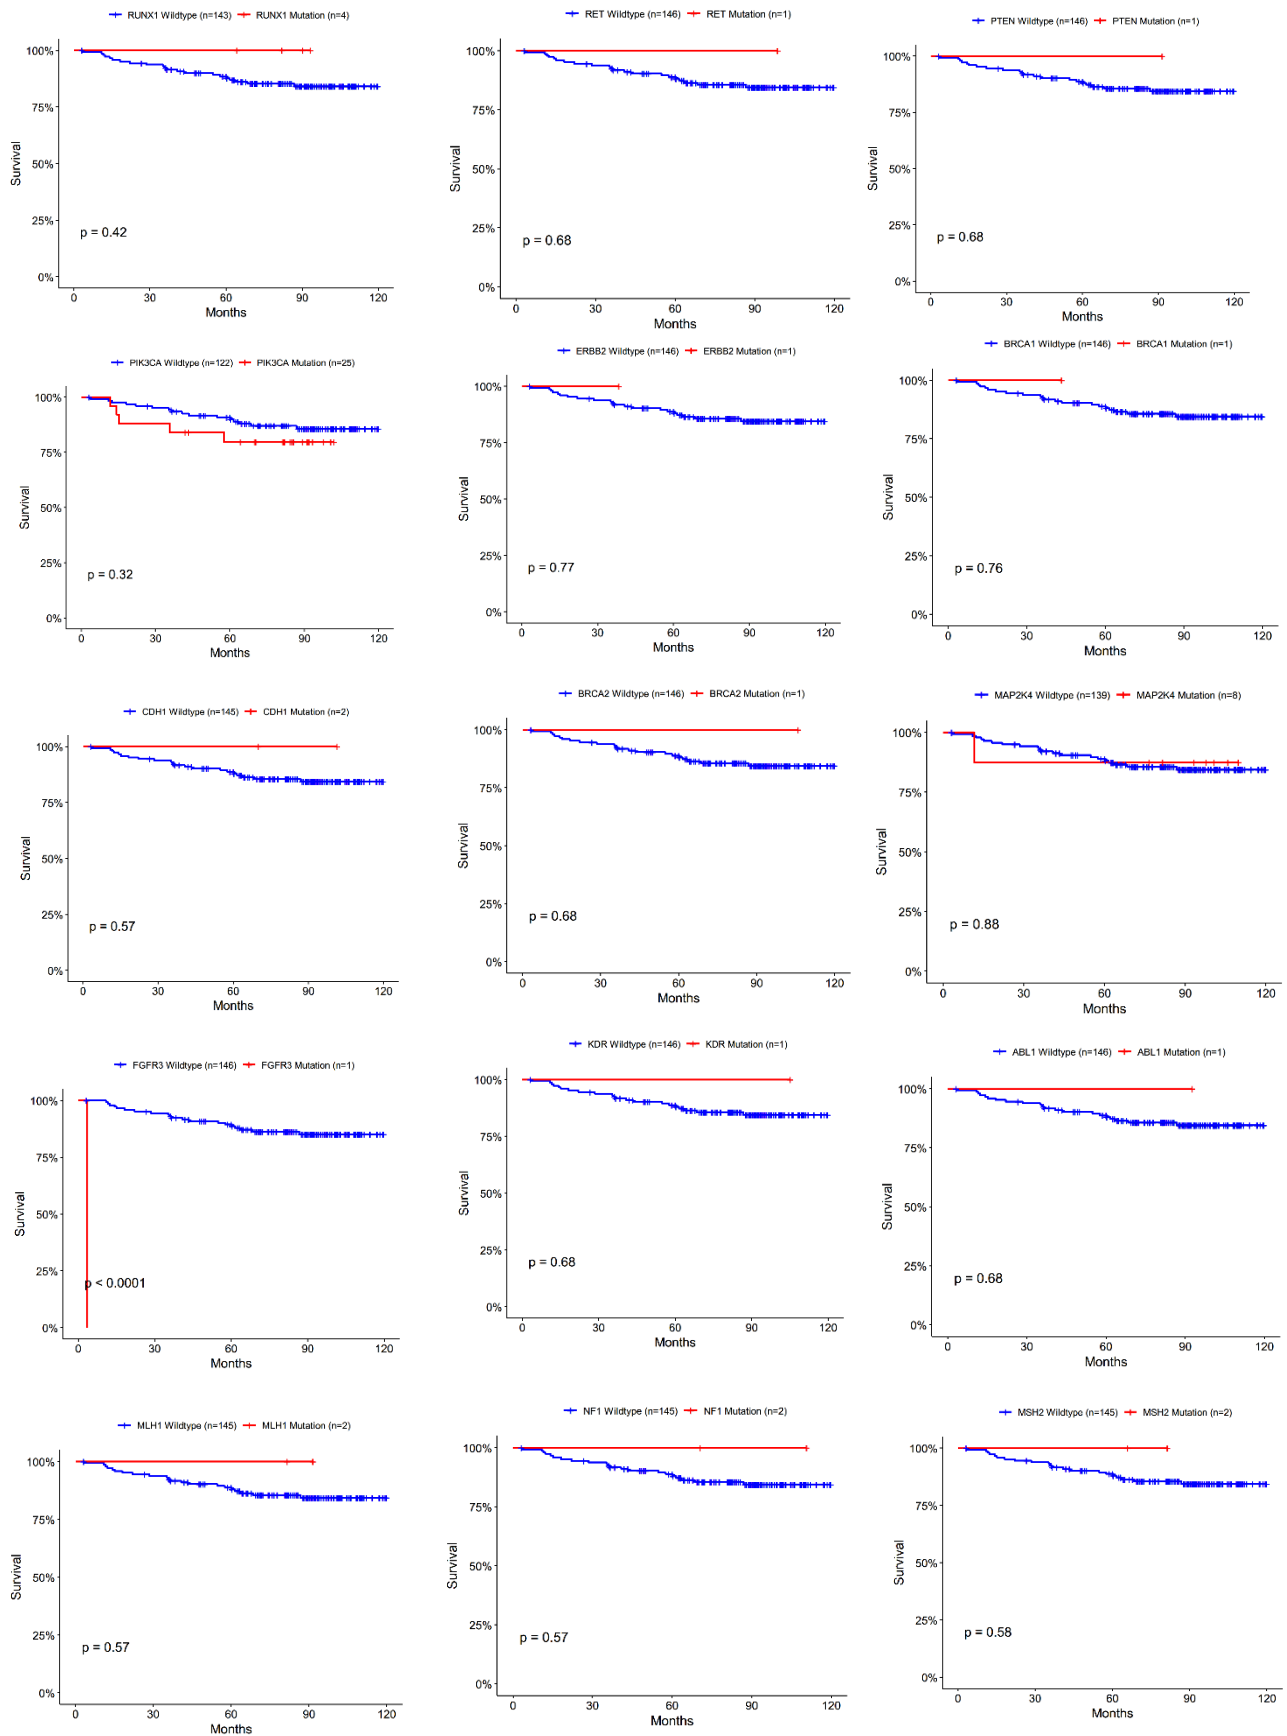

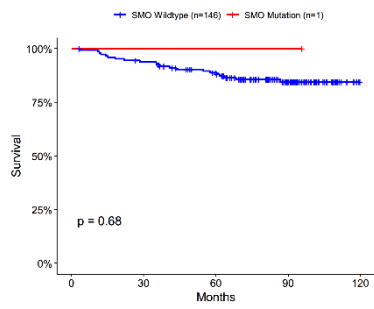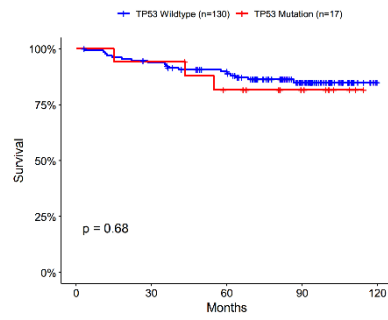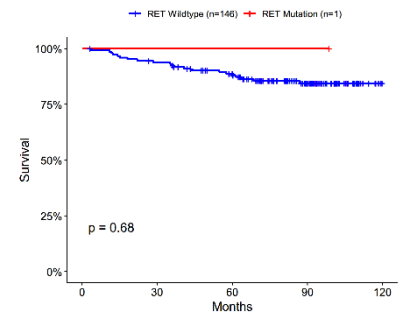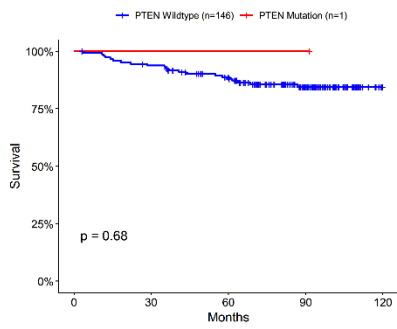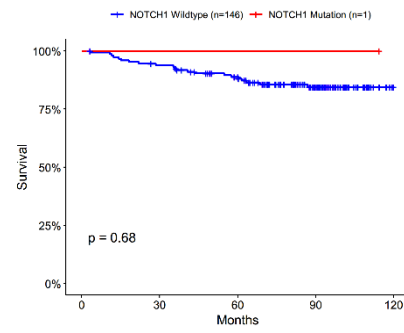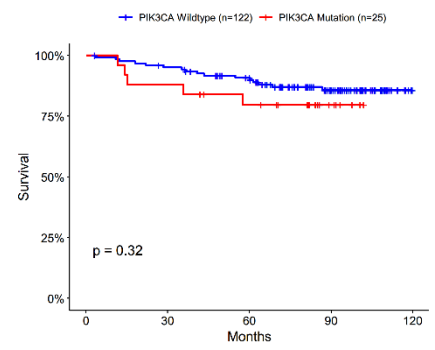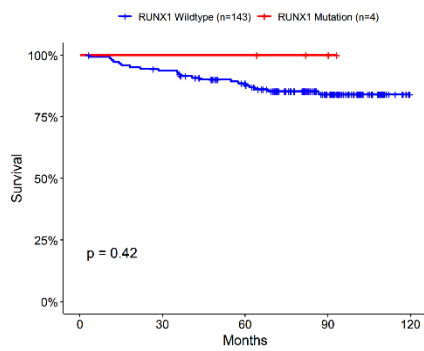

Supplement: Data_Sheet_3.zip [file Supplementary Figure 4.PDF › Supplementary Figure 4.PDF]
