# Supplementary material for: Association of Pathway Mutations With Survival in Taiwanese Breast Cancers
Source: Front Oncol. 2022 Jul 22;12:819555. doi: 10.3389/fonc.2022.819555 (PMC9354680; doi:10.3389/fonc.2022.819555)
Supplement: Supplementary file 2 [file DataSheet_2.xlsx]

## Sheet: 工作表1
Gene	ER+	ER-	p value	PR+	PR-	p value	HER+	HER-	p value	TN	non-TN	p value
ABL1
wt	97 (66)	49 (34)	0.340136	75 (51)	71 (49)	0.489796	42 (29)	102 (71)	1	28 (19)	118 (81)	0.197279
mut	0 (0)	1 (100)		0 (0)	1 (100)		0 (0)	1 (100)		1 (100)	0 (0)
APC
wt	96 (68)	46 (32)	0.0457997	74 (52)	68 (48)	0.203009	41 (29)	99 (71)	1	26 (18)	116 (82)	0.00627041
mut	1 (20)	4 (80)		1 (20)	4 (80)		1 (20)	4 (80)		3 (60)	2 (40)
BRCA1
wt	97 (66)	49 (34)	0.340136	75 (51)	71 (49)	0.489796	41 (28)	103 (72)	0.289655	29 (20)	117 (80)	1
mut	0 (0)	1 (100)		0 (0)	1 (100)		1 (100)	0 (0)		0 (0)	1 (100)
BRCA2
wt	97 (66)	49 (34)	0.340136	75 (51)	71 (49)	0.489796	42 (29)	102 (71)	1	28 (19)	118 (81)	0.197279
mut	0 (0)	1 (100)		0 (0)	1 (100)		0 (0)	1 (100)		1 (100)	0 (0)
CDH1
wt	95 (66)	50 (34)	0.548038	74 (51)	71 (49)	1	42 (29)	102 (71)	1	29 (20)	116 (80)	1
mut	2 (100)	0 (0)		1 (50)	1 (50)		0 (0)	1 (100)		0 (0)	2 (100)
ERBB2
wt	97 (66)	49 (34)	0.340136	75 (51)	71 (49)	0.489796	41 (28)	103 (72)	0.289655	29 (20)	117 (80)	1
mut	0 (0)	1 (100)		0 (0)	1 (100)		1 (100)	0 (0)		0 (0)	1 (100)
FBXW7
wt	97 (66)	49 (34)	0.340136	75 (51)	71 (49)	0.489796	42 (29)	102 (71)	1	28 (19)	118 (81)	0.197279
mut	0 (0)	1 (100)		0 (0)	1 (100)		0 (0)	1 (100)		1 (100)	0 (0)
FGFR3
wt	96 (66)	50 (34)	1	74 (51)	72 (49)	1	42 (29)	102 (71)	1	29 (20)	117 (80)	1
mut	1 (100)	0 (0)		1 (100)	0 (0)		0 (0)	1 (100)		0 (0)	1 (100)
KDR
wt	97 (66)	49 (34)	0.340136	75 (51)	71 (49)	0.489796	41 (28)	103 (72)	0.289655	29 (20)	117 (80)	1
mut	0 (0)	1 (100)		0 (0)	1 (100)		1 (100)	0 (0)		0 (0)	1 (100)
KIT
wt	96 (66)	49 (34)	1	74 (51)	71 (49)	1	41 (29)	102 (71)	0.496839	29 (20)	116 (80)	1
mut	1 (50)	1 (50)		1 (50)	1 (50)		1 (50)	1 (50)		0 (0)	2 (100)
MAP2K4
wt	90 (65)	49 (35)	0.26564	72 (52)	67 (48)	0.488267	38 (28)	100 (72)	0.107573	28 (20)	111 (80)	1
mut	7 (88)	1 (12)		3 (38)	5 (62)		4 (57)	3 (43)		1 (12)	7 (88)
MLH1
wt	95 (66)	50 (34)	0.548038	74 (51)	71 (49)	1	41 (29)	102 (71)	0.496839	29 (20)	116 (80)	1
mut	2 (100)	0 (0)		1 (50)	1 (50)		1 (50)	1 (50)		0 (0)	2 (100)
MSH2
wt	95 (66)	50 (34)	0.548038	75 (52)	70 (48)	0.238188	41 (29)	102 (71)	0.496839	29 (20)	116 (80)	1
mut	2 (100)	0 (0)		0 (0)	2 (100)		1 (50)	1 (50)		0 (0)	2 (100)
NF1
wt	96 (66)	49 (34)	1	74 (51)	71 (49)	1	42 (29)	101 (71)	1	28 (19)	117 (81)	0.356724
mut	1 (50)	1 (50)		1 (50)	1 (50)		0 (0)	2 (100)		1 (50)	1 (50)
NOTCH1
wt	97 (66)	49 (34)	0.340136	75 (51)	71 (49)	0.489796	42 (29)	102 (71)	1	28 (19)	118 (81)	0.197279
mut	0 (0)	1 (100)		0 (0)	1 (100)		0 (0)	1 (100)		1 (100)	0 (0)
PIK3CA
wt	80 (66)	42 (34)	1	62 (51)	60 (49)	1	34 (28)	87 (72)	0.626798	25 (20)	97 (80)	0.784893
mut	17 (68)	8 (32)		13 (52)	12 (48)		8 (33)	16 (67)		4 (16)	21 (84)
PTEN
wt	96 (66)	50 (34)	1	74 (51)	72 (49)	1	42 (29)	102 (71)	1	29 (20)	117 (80)	1
mut	1 (100)	0 (0)		1 (100)	0 (0)		0 (0)	1 (100)		0 (0)	1 (100)
RB1
wt	95 (66)	48 (34)	0.605183	73 (51)	70 (49)	1	41 (29)	100 (71)	1	28 (20)	115 (80)	1
mut	2 (50)	2 (50)		2 (50)	2 (50)		1 (25)	3 (75)		1 (25)	3 (75)
RET
wt	96 (66)	50 (34)	1	74 (51)	72 (49)	1	41 (28)	103 (72)	0.289655	29 (20)	117 (80)	1
mut	1 (100)	0 (0)		1 (100)	0 (0)		1 (100)	0 (0)		0 (0)	1 (100)
RUNX1
wt	94 (66)	49 (34)	1	72 (50)	71 (50)	0.620131	40 (28)	101 (72)	0.579551	29 (20)	114 (80)	0.585444
mut	3 (75)	1 (25)		3 (75)	1 (25)		2 (50)	2 (50)		0 (0)	4 (100)
SMO
wt	96 (66)	50 (34)	1	74 (51)	72 (49)	1	42 (29)	102 (71)	1	29 (20)	117 (80)	1
mut	1 (100)	0 (0)		1 (100)	0 (0)		0 (0)	1 (100)		0 (0)	1 (100)
TP53
wt	89 (68)	41 (32)	0.102961	69 (53)	61 (47)	0.202324	38 (30)	90 (70)	0.778306	22 (17)	108 (83)	0.0451063
mut	8 (47)	9 (53)		6 (35)	11 (65)		4 (24)	13 (76)		7 (41)	10 (59)
