# Supplementary figures and images for: Association of Pathway Mutations With Survival in Taiwanese Breast Cancers
Source: Frontiers journal article supplement (doi:10.3389/fonc.2022.819555), 2022-07-22

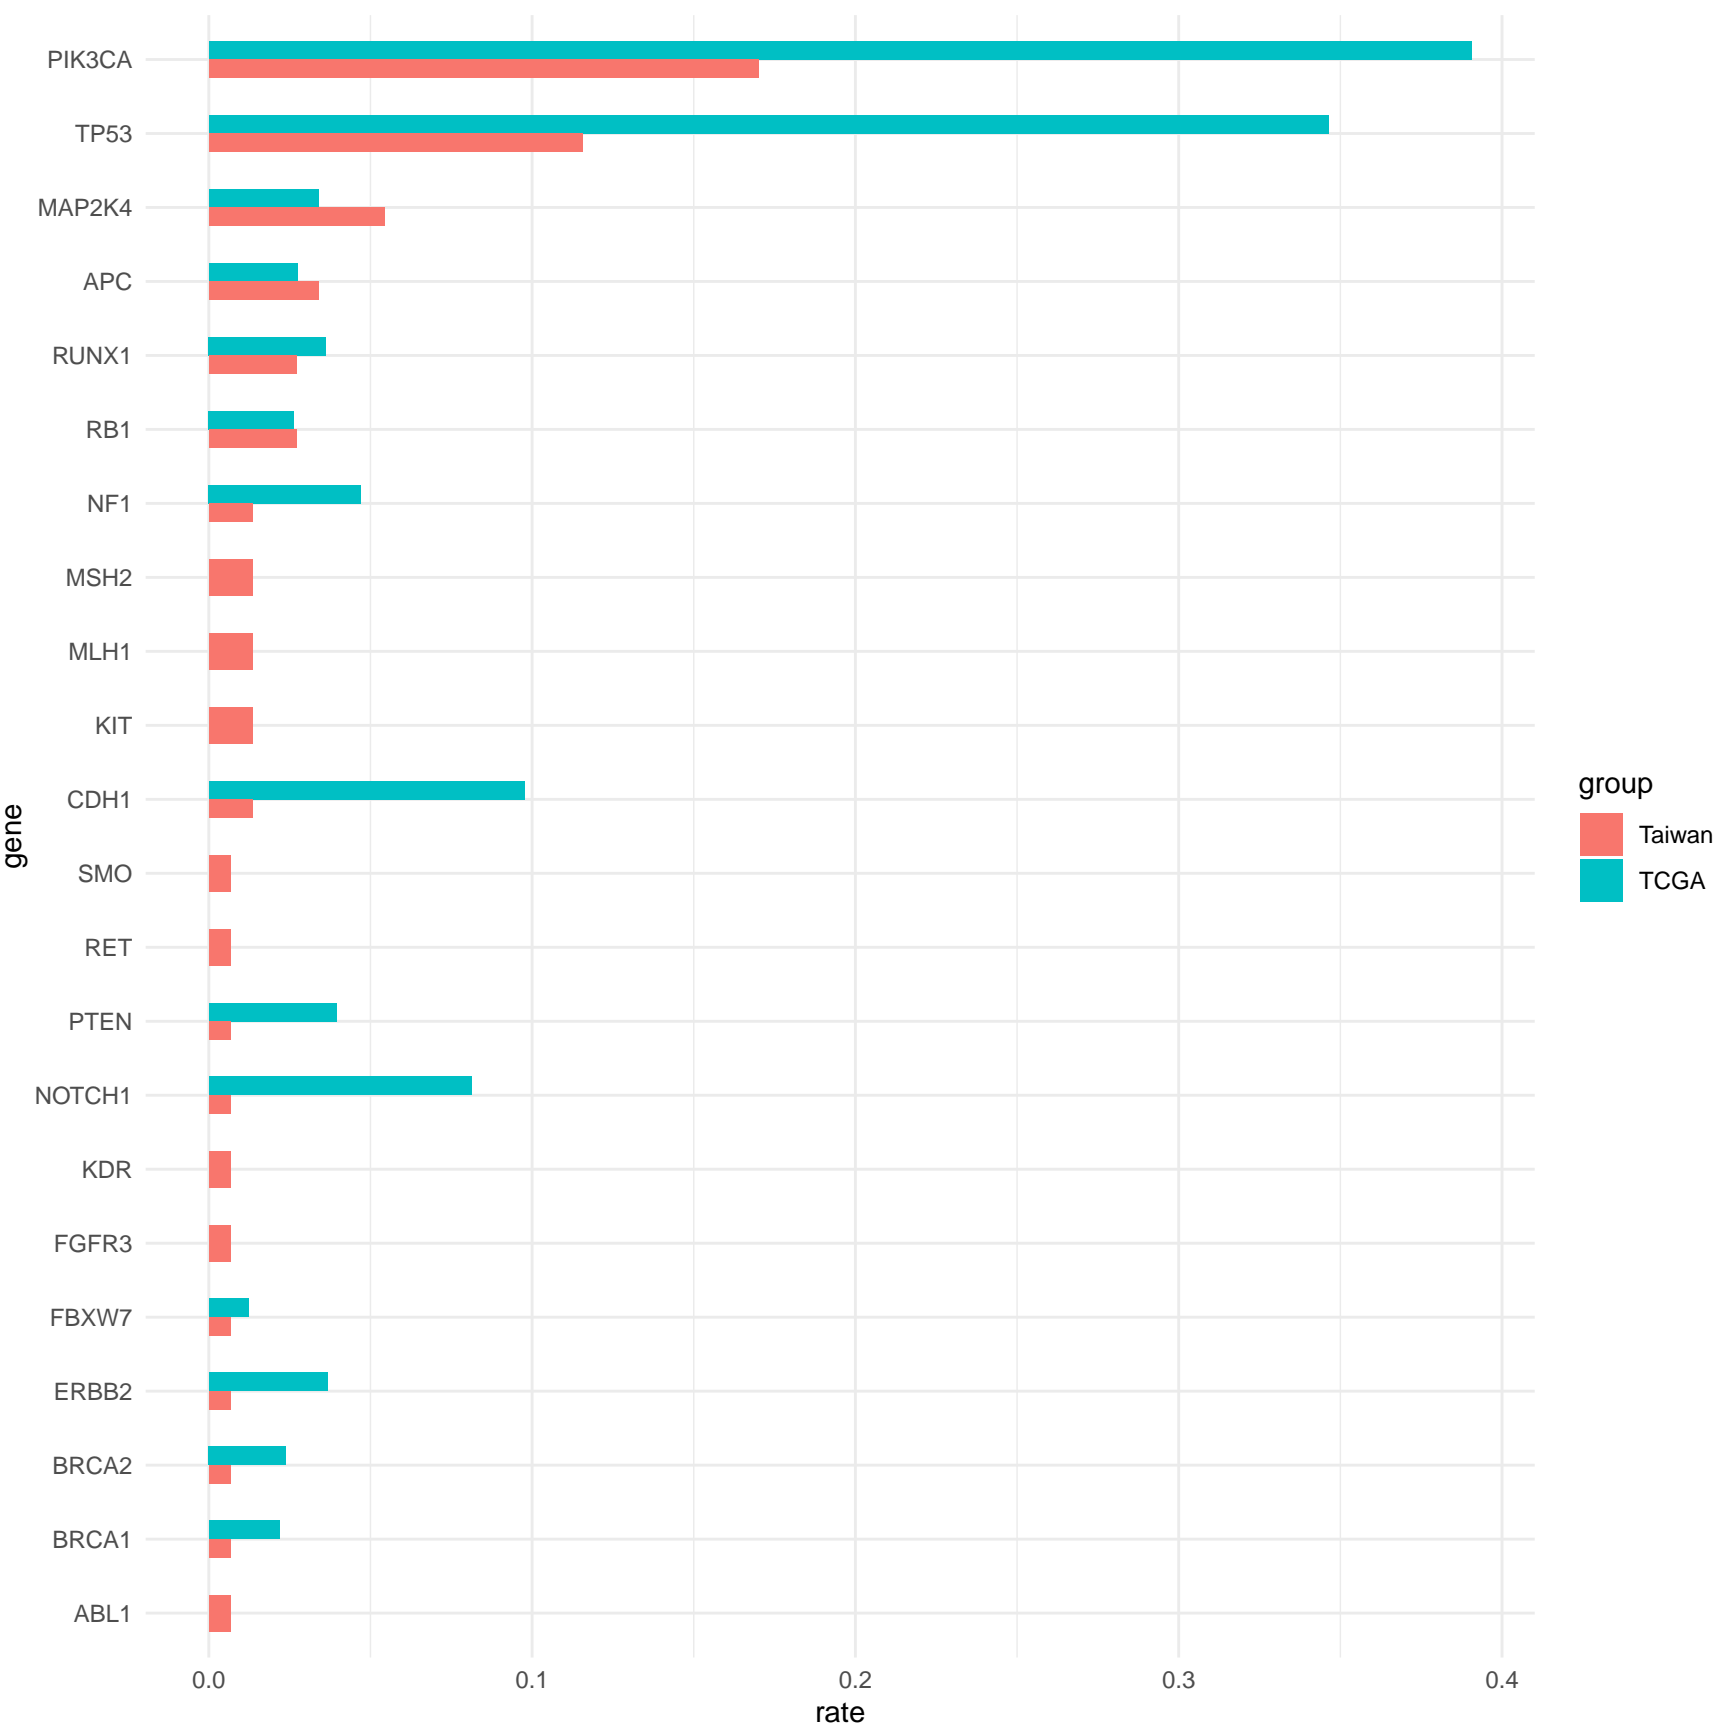

Supplement: Data_Sheet_3.zip [file Supplementary Figure 3.PDF › Supplementary Figure 3.PDF]
